# Supplementary material for: Fluoromycobacteriophages for Rapid, Specific, and Sensitive Antibiotic Susceptibility Testing of Mycobacterium tuberculosis
Source: PLOS journal article supplement (doi:10.1371/journal.pone.0004870), 2009-03-19
Supplement: S1 (10.1371/journal.pone.0004870.s001) [file journal.pone.0004870.s001]

**Table S1: Percentage of *M. tuberculosis* mc<sup>2</sup>6230 cells infected with pHAE87::*Hsp60-EGFP***

*M. tuberculosis* mc<sup>2</sup>6230 cells were infected with pHAE87::*Hsp60-EGFP* after growth until mid or late exponential phase in the presence or absence of Tween. About 10 individual fields for each condition were recorded and the percentage of fluorescent cells compare to total cells was calculated. The % mean  $\pm$  SD was calculated.

| OD <sub>600nm</sub> | Growth medium  | % fluorescent cells |
|---------------------|----------------|---------------------|
| 0.6                 | 7H9+OADC       | 51 $\pm$ 9          |
|                     | 7H9+OADC+Tween | 37 $\pm$ 9          |
| 1.6                 | 7H9+OADC       | 67 $\pm$ 7          |
|                     | 7H9+OADC+Tween | 43 $\pm$ 15         |
